# Supplementary material for: Rewilding with large herbivores: Positive direct and delayed effects of carrion on plant and arthropod communities
Source: PLOS journal article supplement (doi:10.1371/journal.pone.0226946), 2020-01-22
Supplement: S1 (10.1371/journal.pone.0226946.s001) [file journal.pone.0226946.s001]

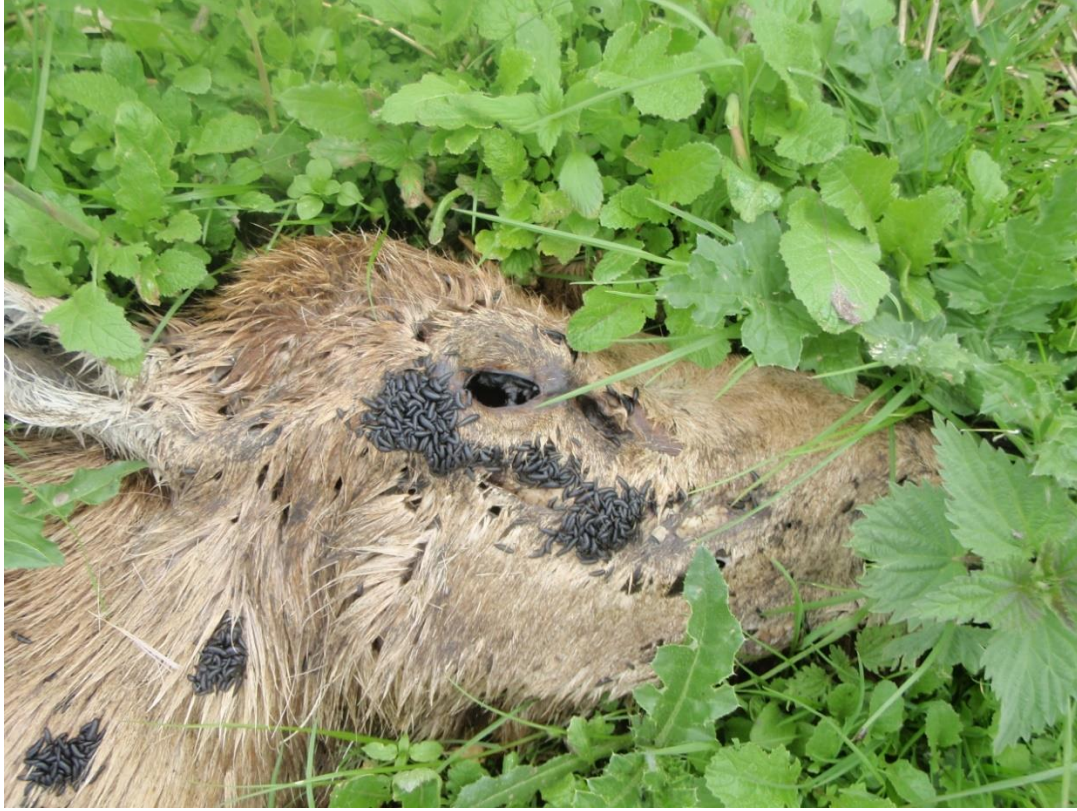

**S1 Photo.** Red deer carcass undergoing decomposition, ca. 1.5 months after death. The black larvae belong mostly to *Thanatophilus rugosus* (Coleoptera: Silphidae).
